# Supplementary material for: Bio-Based pH Indicator Films for Intelligent Food Packaging Applications
Source: Polymers (Basel). 2022 Sep 1;14(17):3622. doi: 10.3390/polym14173622 (PMC9460188; doi:10.3390/polym14173622)
Supplement: Supplementary file 1 [file polymers-14-03622-s001.zip › polymers-1878108-supplementary.pdf]

**Supplementary Materials**  
**Bio-based pH indicator films for intelligent food packaging applications**

**Iulia Păușescu<sup>1</sup>, Diana-Maria Dreavă<sup>1</sup>, Ioan Bîtcă<sup>1</sup>, Raluca Argetoianu<sup>1</sup>, Diana Dăescu<sup>1</sup>, Mihai Medeleanu<sup>1,\*</sup>**

<sup>1</sup>University Politehnica Timișoara, Faculty of Industrial Chemistry and Environmental Engineering, Carol  
 Telbisz 6, 300001 Timisoara, Romania

\* *mihai.medeleanu@upt.ro*

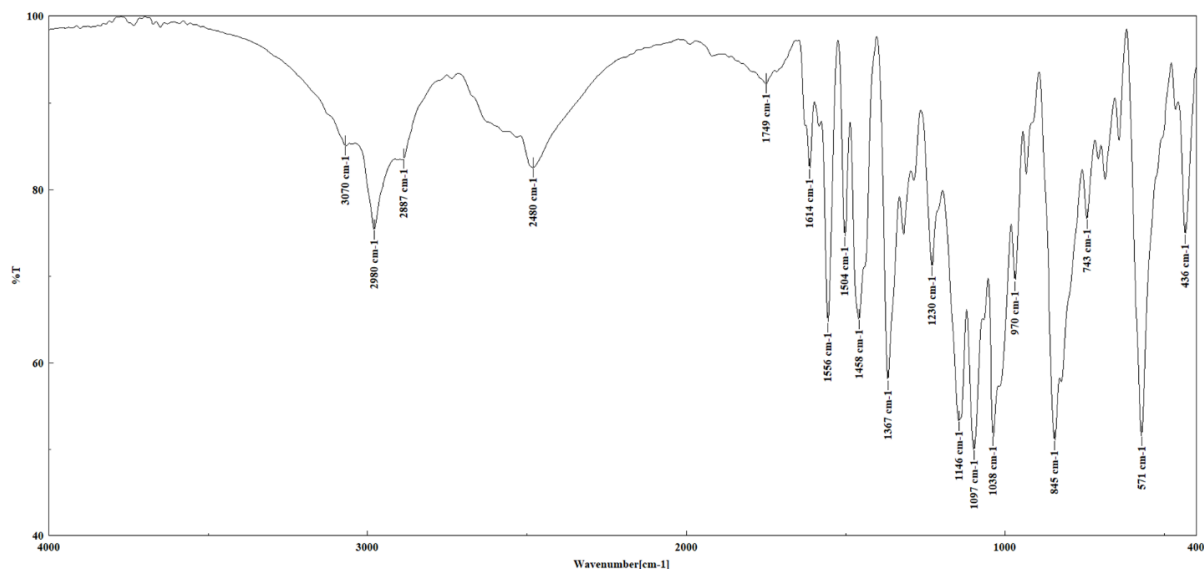

Figure S1. FT-IR spectrum of the synthesized dye

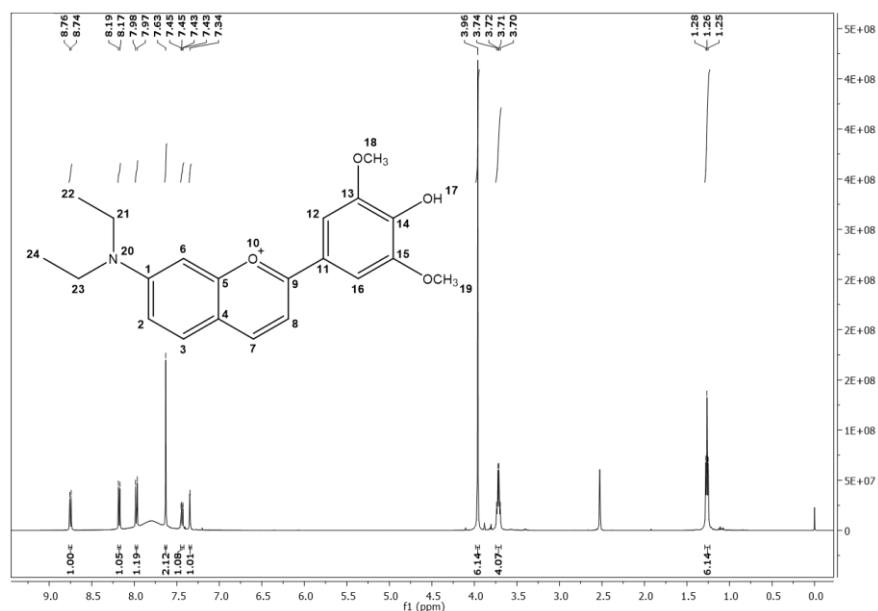

Figure S2. <sup>1</sup>H-NMR spectrum of the bio-inspired dye

**<sup>1</sup>H-RMN** (500 MHz, DMSO-d<sub>6</sub>,  $\delta$  ppm): 1.26 (t, 6H,  $J$ =7.0 Hz, H22, H24); 3.72 (q, 4H,  $J$ =7.0 Hz, H21, H23); 3.96 (s, 6H, H18, H19); 7.34 (s, 1H, H6); 7.44 (dd, 1H,  $J$ =9.4; 2.3 Hz, H2); 7.63 (s, 2H, H12, H16); 7.98 (d, 1H,  $J$ =9.4 Hz, H3); 8.18 (d, 1H,  $J$ =8.3 Hz, H8); 8.75 (d, 1H,  $J$ =8.3, H7).

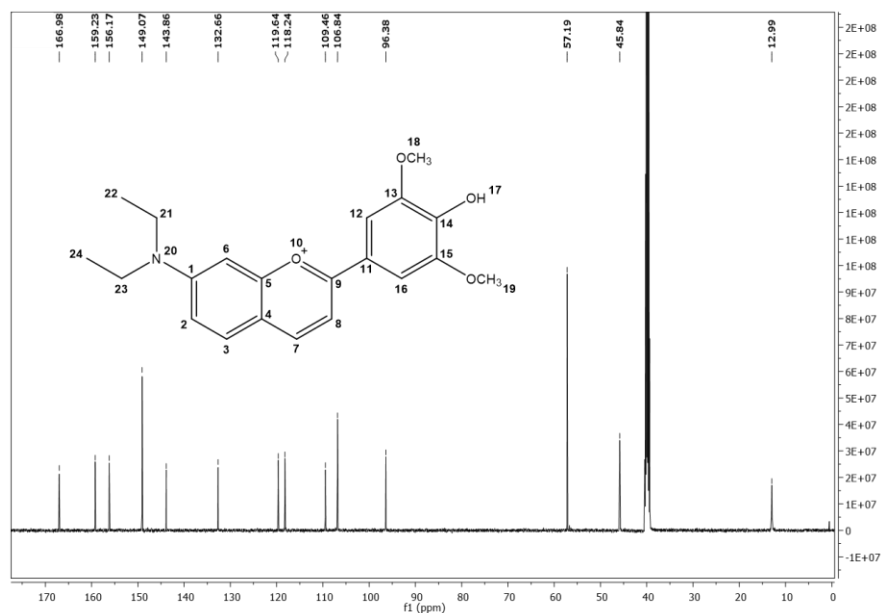

Figure S3.  $^{13}\text{C}$ -NMR spectrum of the bio-inspired dye

$^{13}\text{C}$ -RMN (125 MHz, DMSO- $d_6$ ,  $\delta$  ppm): 12.9 (C22, C24); 45.8 (C21, C23), 57.1 (C18, C19); 96.3 (C6); 106.8 (C12, C16); 109.4 (C8), 118.2 (C2), 119.6 (C4, C11); 132.6 (C3), 143.8 (C14); 149.0 (C7, C13, C15); 156.1 (C1); 159.2 (C5); 166.9 (C9).

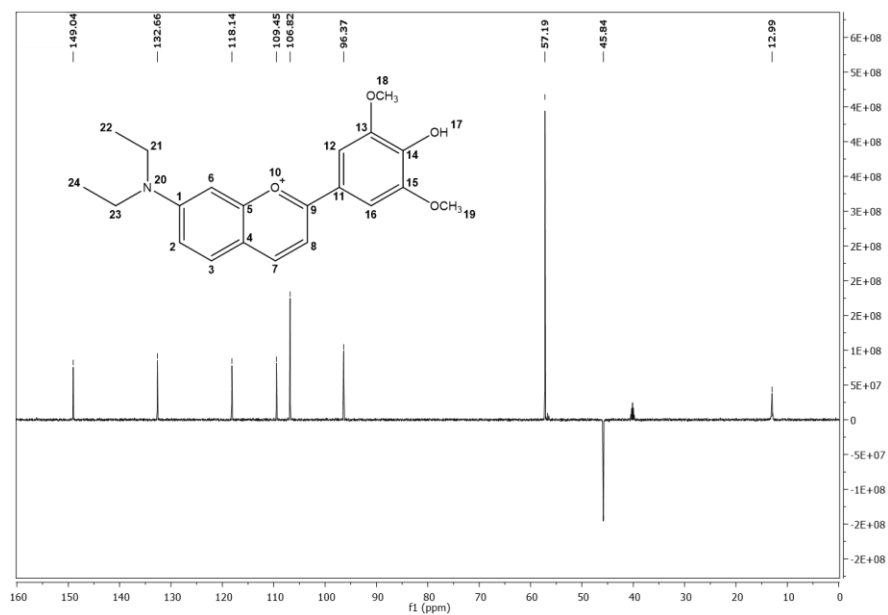

Figure S4. DEPT 135 spectrum of the synthesized dye

45.8 (C21, C23 – secondary carbon atoms), 57.1 (C18, C19 – tertiary carbon atoms), 96.3 (C6 – tertiary carbon atom); 106.8 (C12, C16 – tertiary carbon atoms); 109.4 (C8 – tertiary carbon atom), 118.2 (C2 – tertiary carbon atom), 132.6 (C3 tertiary carbon atom), 149.0 (C7 tertiary carbon atom).

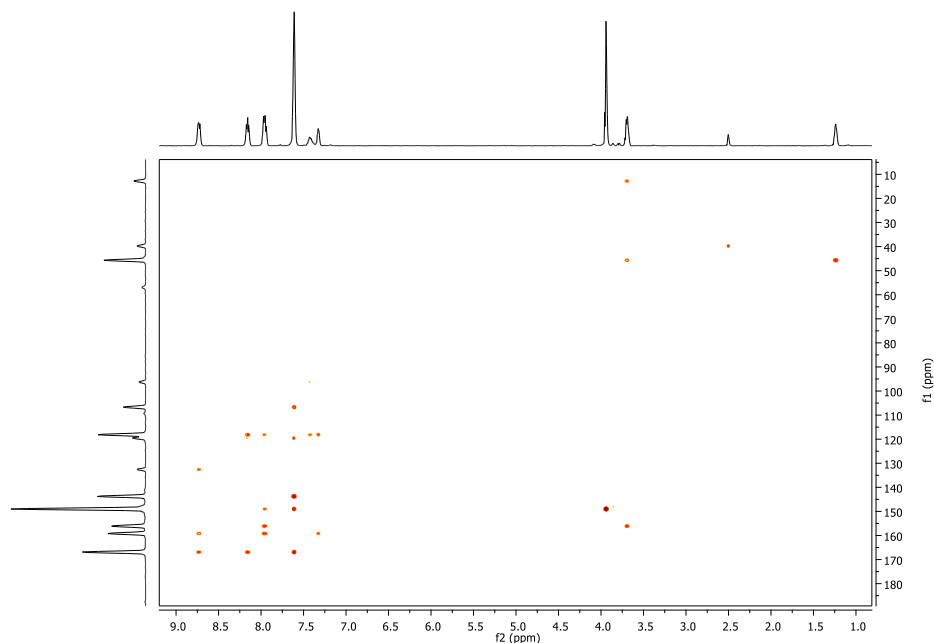

Figure S5. HMBC spectrum of the synthesized dye

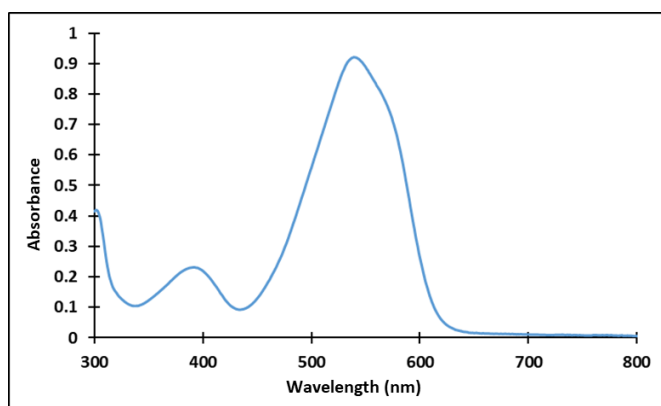

Figure S6. UV-VIS spectrum of the dye

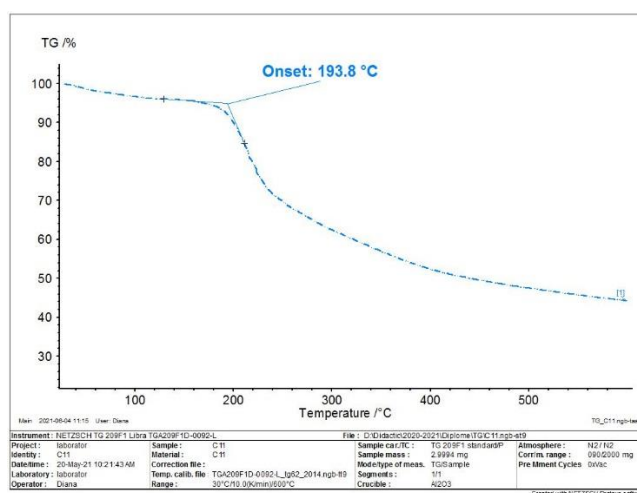

Figure S7. Thermogram of the dye

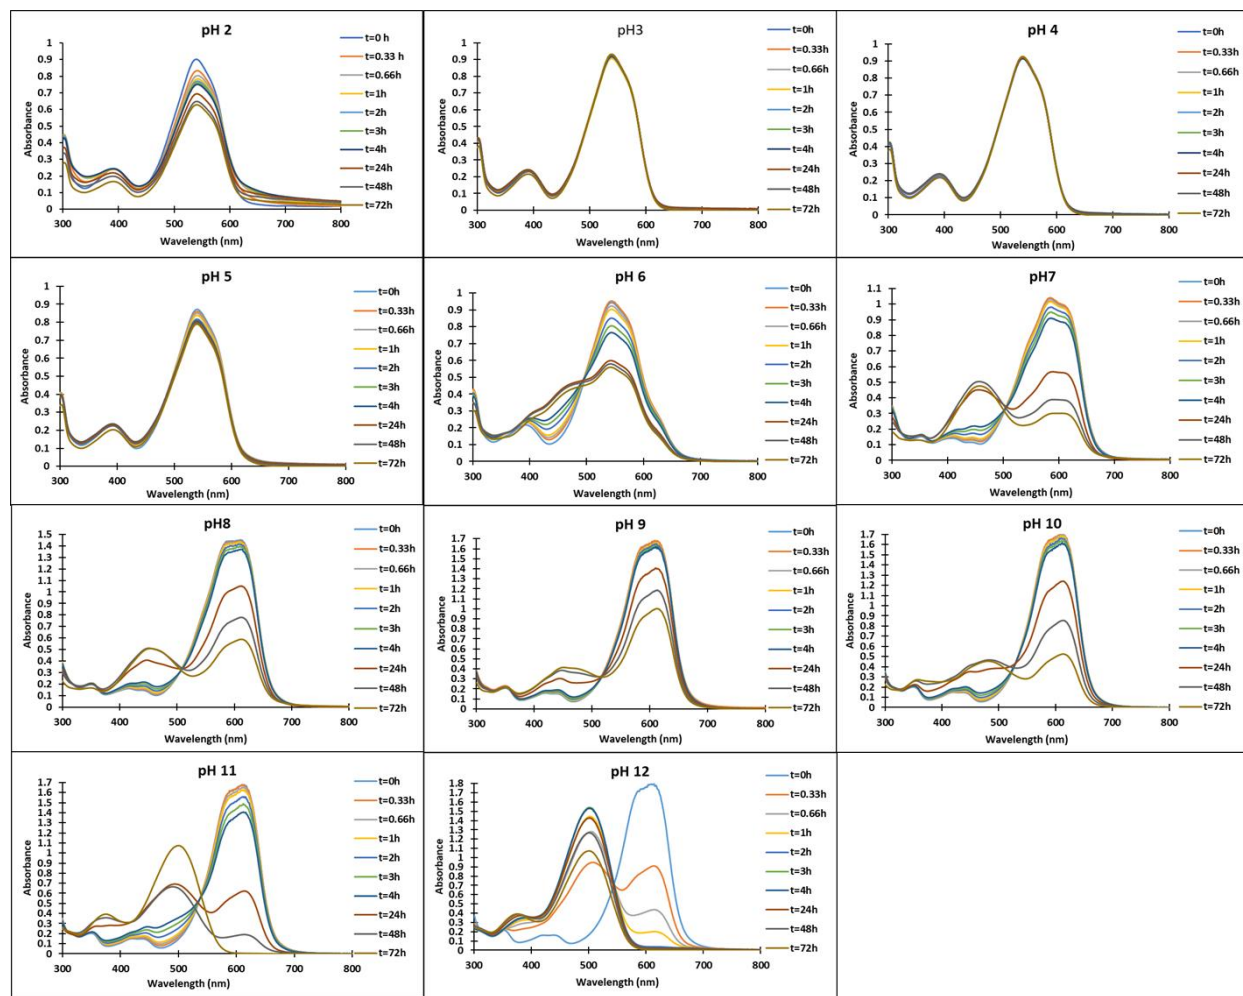

Figure S8. UV-VIS spectra of dye solutions ( $7 \cdot 10^{-5}$  M methanol: water 1:14) at pH ranging from 2 to 12 over time

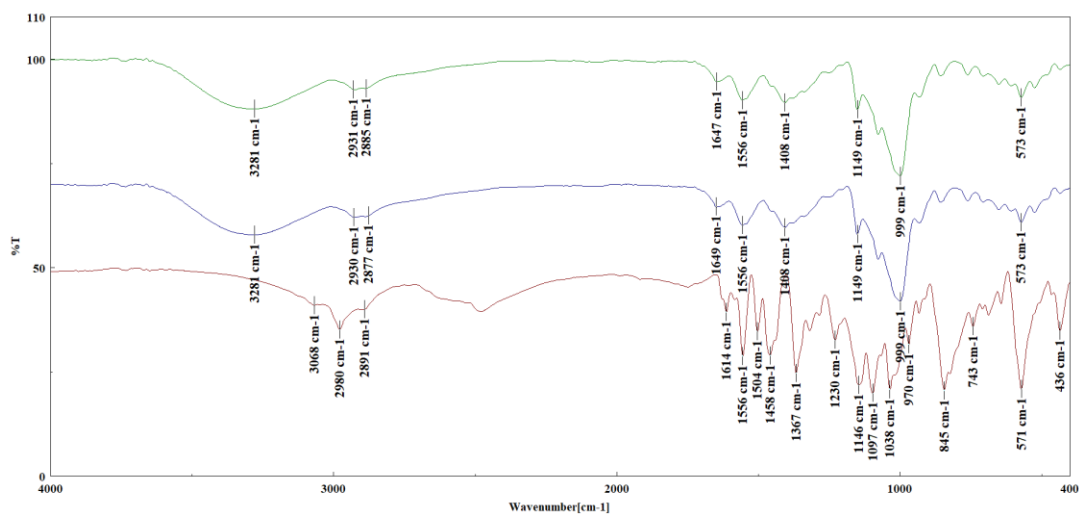

Figure S9. FT-IR spectra of chitosan-starch-dye (green), chitosan-starch (blue) and dye (red)

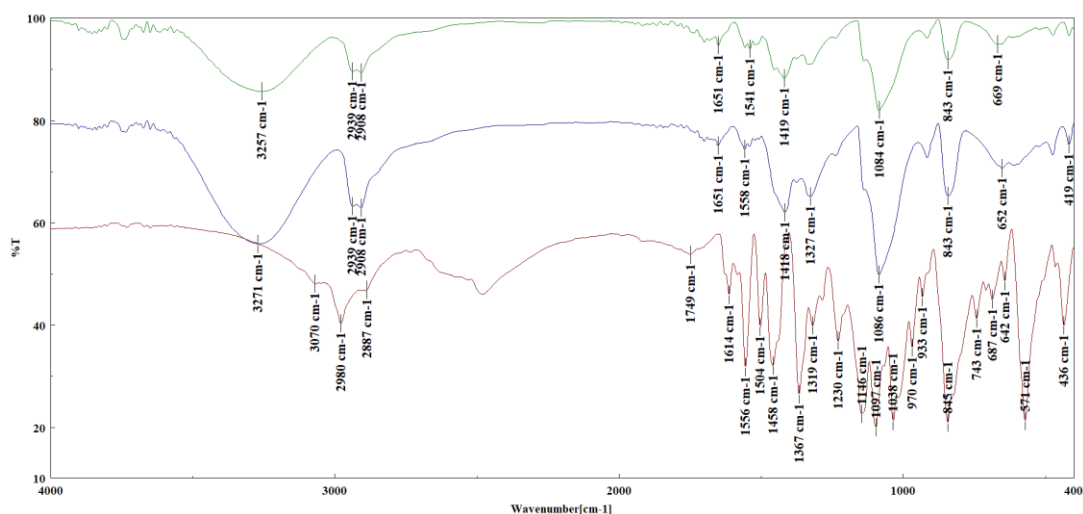

Figure S10. FT-IR spectra of chitosan-PVA-dye (green), chitosan-PVA (blue) and dye (red)

Table S1. Weight losses of the chitosan-cellulose-dye film, chitosan-cellulose film and of the dye

| Compound      | Weight loss [%] |          |          |          |          |
|---------------|-----------------|----------|----------|----------|----------|
|               | 25-200°C        | 25-300°C | 25-400°C | 25-500°C | 25-600°C |
| chit-cell-dye | 18.71           | 46.06    | 63.37    | 66.59    | 68.64    |
| chit-cell     | 20.65           | 49.09    | 65.89    | 68.90    | 70.84    |
| dye           | 9.91            | 37.52    | 47.62    | 52.52    | 55.78    |

Table S2. Weight losses of the chitosan-starch-dye film, chitosan-starch film and of the dye

| Compound            | Weight loss [%] |          |          |          |          |
|---------------------|-----------------|----------|----------|----------|----------|
|                     | 25-200°C        | 25-300°C | 25-400°C | 25-500°C | 25-600°C |
| chitosan-starch-dye | 9.32            | 34.24    | 66.16    | 70.63    | 72.81    |
| chitosan-starch     | 9.15            | 37.32    | 67.02    | 71.29    | 73.30    |
| dye                 | 9.91            | 37.44    | 47.54    | 52.44    | 55.69    |

Table S3. Weight losses of the chitosan-PVA-dye film, chitosan-PVA film and of the dye

| Compound         | Weight loss [%] |          |          |          |          |
|------------------|-----------------|----------|----------|----------|----------|
|                  | 25-200°C        | 25-300°C | 25-400°C | 25-500°C | 25-600°C |
| chitosan-PVA-dye | 6.69            | 19.41    | 68.07    | 89.99    | 91.14    |
| chitosan-PVA     | 7.63            | 11.12    | 74.45    | 92.39    | 93.14    |
| dye              | 9.91            | 37.52    | 47.62    | 52.52    | 55.78    |

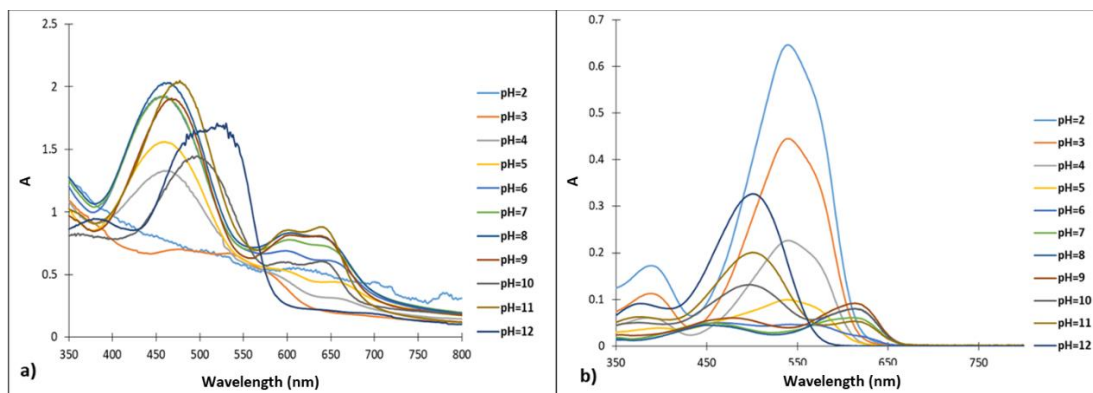

Figure S11. UV-VIS spectra of the chitosan-starch-dye films after 1h in buffer solutions a) and of the buffer solutions b)

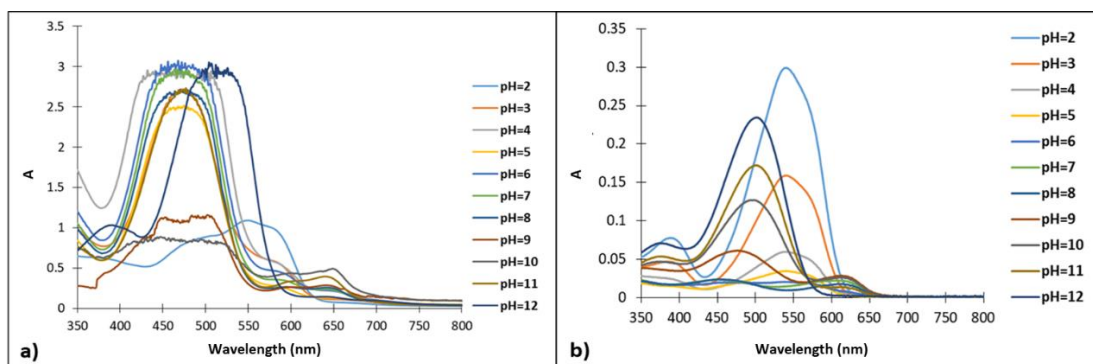

Figure S12. UV-VIS spectra of the chitosan-PVA-dye film after 1h in buffer solutions a) and of the buffer solutions b)

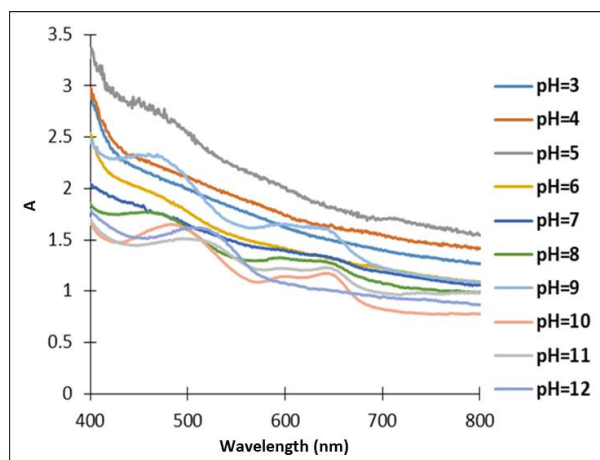

Figure S13. UV-VIS spectra of the chitosan-cellulose-dye film after 1h in buffer solutions
